# Supplementary material for: Highly efficient degradation of tetracycline by activated peroxymonosulfate over MoS2/ZnO heterostructure nanocomposites
Source: Royal Society of Chemistry journal article supplement (doi:10.1039/d3nj04717b), 2023-01-01
Supplement: d3nj04717b1.pdf [file d3nj04717b1.pdf]

## Supplementary date

### *High efficient degradation of tetracycline by activated*

### *peroxymonosulfate over MoS<sub>2</sub>/ZnO heterostructure nanocomposite*

Shoujie Jiang<sup>1, 2, †</sup>, Lili Wang<sup>1, †</sup>, Yuyang Zhou<sup>3</sup>, Haixiang Wang<sup>1</sup>, Qiaoli Lu<sup>1</sup>, Jinmei Wang<sup>2</sup>, Chunxia Wang<sup>1, 2</sup>, Dawei Gao<sup>1, \*</sup>,

1 College of Textiles and Clothes, Yancheng Institute of Technology, Yancheng, 224051, China

2 School of Textile Science and Engineering, Xi'an Polytechnic University, Xi'an 710048, China

3 National Engineering Laboratory for Modern Silk, College of Textile and Clothing Engineering, Soochow University, Suzhou 215123, China

*Corresponding authors:*

gaodawei@ycit.edu.cn (D. Gao)

† Shoujie Jiang and Lili Wang contributed equally to this work (co-first author).

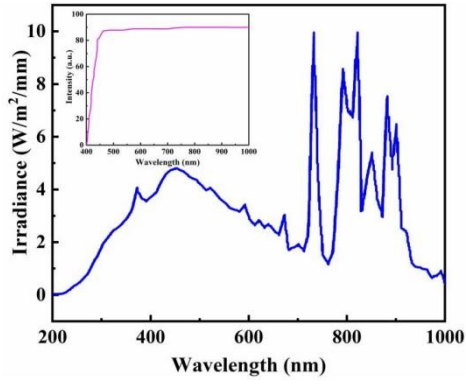

**Figure S1** Xe spectrum produced by Xenon lamp and transmittance of the cut-off film (Inserted).

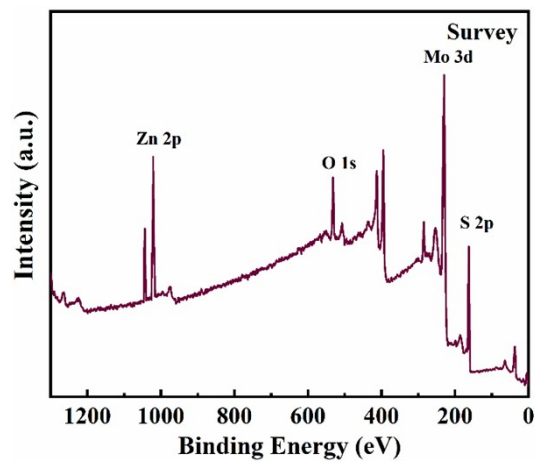

**Figure S2** The XPS survey spectrum.

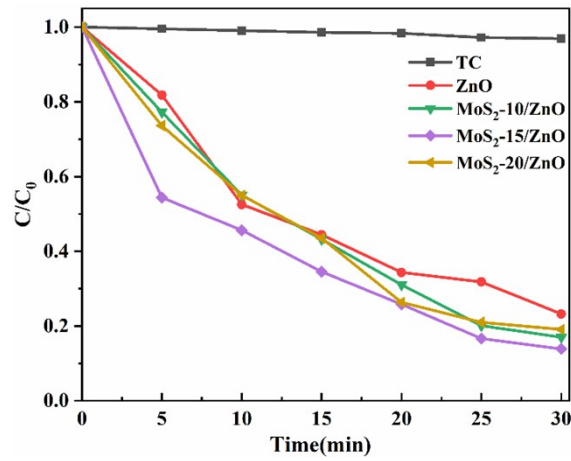

**Figure S3** Degradation of TC by different proportions of complexes.

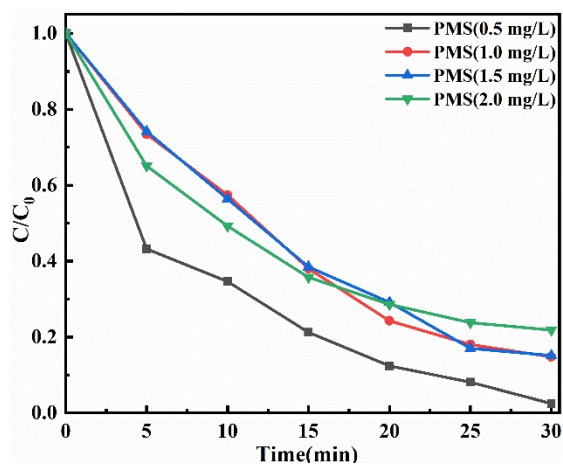

Figure S3 The effect the concentration of PMS on TC degradation.

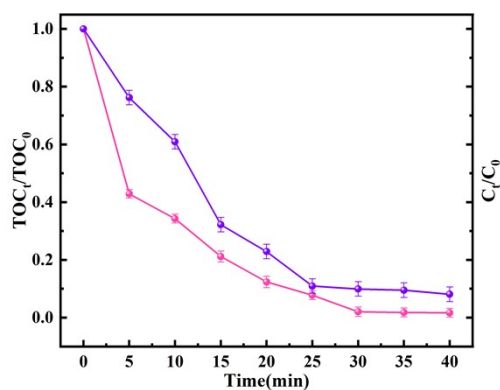

Figure S4 TOC removal rate and degradation rate of TC.

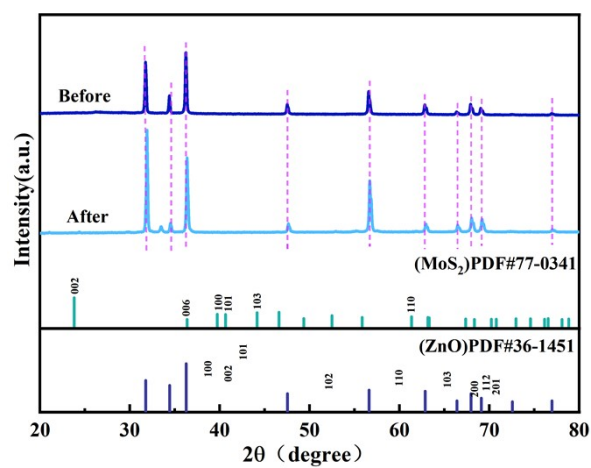

Figure S5 XRD patterns of MZ-15 after 5 cycles' photocatalysis.

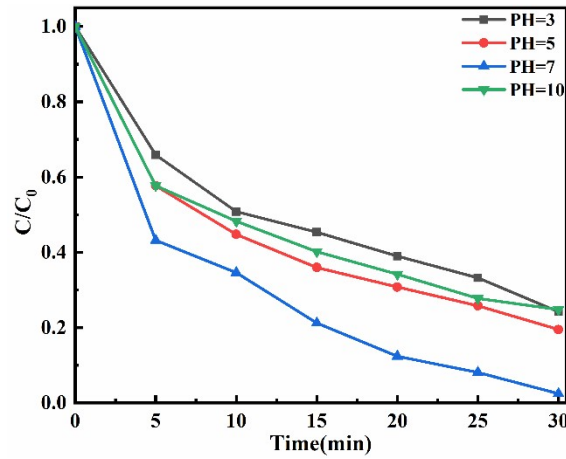

**Figure S6** The effect of PH on TC degradation.

Under acidic and neutral conditions, PMS exists in the main form of  $\text{HSO}_5^-$ , which is easily activated to form  $\text{SO}_4^{\bullet-}$  to oxidize TC. But PMS mainly exists as  $\text{SO}_5^{2-}$  at a high pH value, which has a limited capability of  $\text{SO}_4^{\bullet-}$  generation.

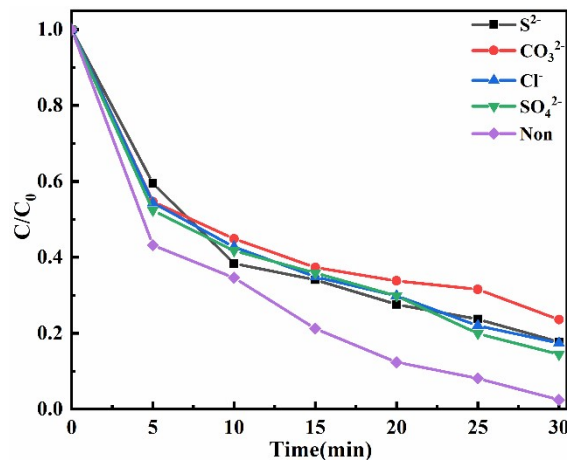

**Figure S7** The effect of Coexisting anions on TC degradation.

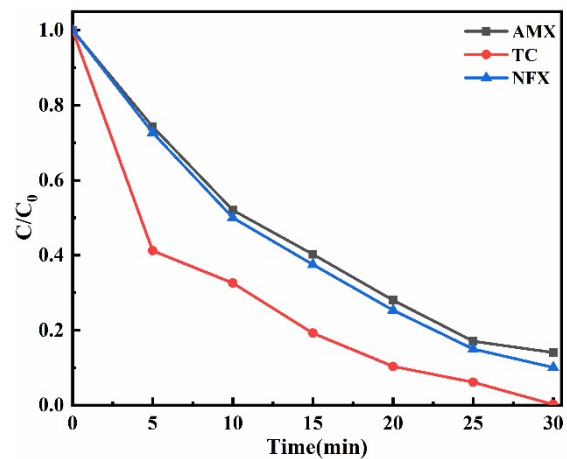

**Figure S8** Comparison of degradation of different antibiotics

**Table S1** Comparison of photocatalytic efficiency of different ZnO-based hybrid photocatalysts with respect to TC degradation.

| Samples                                  | C <sup>a</sup> (g-L <sup>-1</sup> ) | C <sub>b</sub> TC (mgL <sup>-1</sup> ) | Reaction Time (min) | Degradation Efficiency | K <sub>app</sub> (min <sup>-1</sup> ) | Reference        |
|------------------------------------------|-------------------------------------|----------------------------------------|---------------------|------------------------|---------------------------------------|------------------|
| ZnGa <sub>2</sub> O <sub>4</sub> /ZnO    | 0.05                                | 30                                     | 30                  | 87.85%                 | 5.7×10 <sup>-3</sup>                  | (1)              |
| C-ZnO/A-CN                               | 0.02                                | 50                                     | 100                 | 86.5%                  | 5.3×10 <sup>-3</sup>                  | (2)              |
| AgCl/ZnO/g-C <sub>3</sub> N <sub>4</sub> | 1.5                                 | 20                                     | 50                  | 89.05%                 | 5.9×10 <sup>-3</sup>                  | (3)              |
| ZnO/PbBiO <sub>2</sub> Cl                | 0.5                                 | 10                                     | 150                 | 97%                    | 8×10 <sup>-2</sup>                    | (4)              |
| ZnO/g-C <sub>3</sub> N <sub>4</sub>      | 0.1                                 | 10                                     | 60                  | 92.6%                  | 8.1×10 <sup>-3</sup>                  | (5)              |
| MoS <sub>2</sub> /ZnO/PMS                | 0.02                                | 10                                     | 30                  | 97.56%                 | 11.4×10 <sup>-2</sup>                 | <i>This work</i> |

## Reference

- [1] W. Chen, T. Kang, F. Du, P. Han, M. Gao, P. Hu, F. Teng, H. Fan, A new S-scheme heterojunction of 1D ZnGa<sub>2</sub>O<sub>4</sub>/ZnO nanofiber for efficient photocatalytic degradation of TC-HCl, *Environ. Res.*, 2023, 116388.
- [2] X. Huang, X. Zhang, K. Zhang, K. Zhang, X. Xue, J. Xiong, Y. Huang, D. Zhang, J. Zhang, Z. Zhang, F. Yan, Defect-mediated Z-scheme carriers' dynamics of C-ZnO/A-CN toward highly enhanced photocatalytic TC degradation, *J. Alloy. Compd.*, 2021, **877**, 160321.
- [3] C. Ding, Q. Zhu, B. Yang, E. Petropoulos, L. Xue, Y. Feng, S. He, L. Yang, Efficient photocatalysis of tetracycline hydrochloride (TC-HCl) from pharmaceutical wastewater using AgCl/ZnO/g-C<sub>3</sub>N<sub>4</sub> composite under visible light: Process and mechanisms, *J. Environ. Sci.*, 2023, **126**, 249-262.
- [4] H. Seyyedbagheri, R. Alizadeh, B. Mirzayi, A novel heterostructure ZnO/PbBiO<sub>2</sub>Cl as a type-II photocatalyst for persulfate activation in tetracycline degradation under visible light, *J. Mol. Liq.*, 2023, **383**, 122067.
- [5] T. Pham, M. Tran, T. Chu, Y. Myung, S. Jung, M. Mapari, K. Taeyoung, Enhanced photodegradation of tetracycline in wastewater and conversion of CO<sub>2</sub> by solar light assisted ZnO/g-C<sub>3</sub>N<sub>4</sub>, *Environ. Res.*, 2023, **217**, 114825.
